# Supplementary material for: Venlafaxine and L-Thyroxine Treatment Combination: Impact on Metabolic and Synaptic Plasticity Changes in an Animal Model of Coexisting Depression and Hypothyroidism
Source: MDPI journal article supplement (doi:10.3390/cells10061394), 2021-06-05
Supplement: s1 [file s1]

OXPHOS Frontal cortex, membrane 1

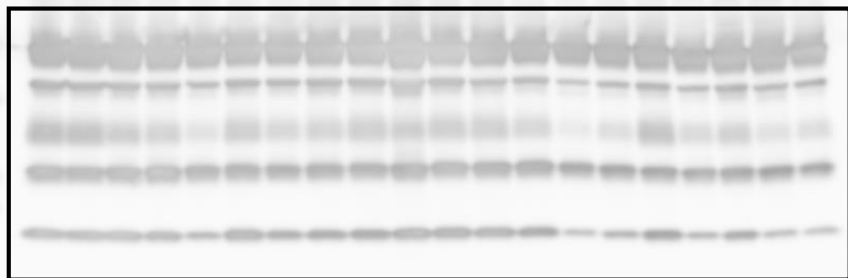

Vinculin as loading control to OXPHOS  
Frontal cortex, membrane 1 and 2

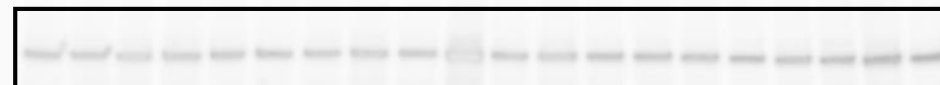

OXPHOS Frontal cortex, membrane 2

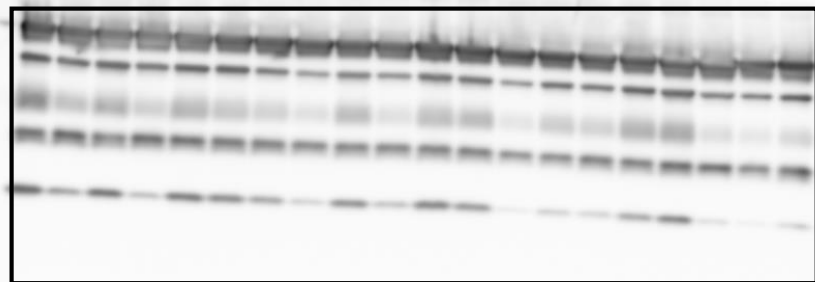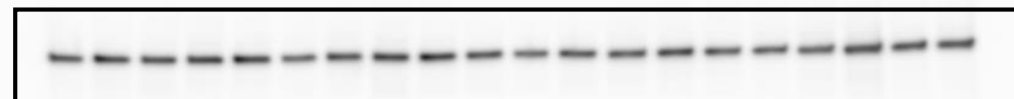

The bands from the left: WKY, WKY+PTU,WKY+PTU+VEN, WKY+PTU+T4, WKY+PTU+T4+VEN, WKY, WKY+PTU,WKY+PTU+VEN, WKY+PTU+T4, WKY+PTU+T4+VEN, WKY, WKY+PTU,WKY+PTU+VEN, WKY+PTU+T4, WKY+PTU+T4+VEN, WKY, WKY+PTU,WKY+PTU+VEN, WKY+PTU+T4, WKY+PTU+T4+VEN

The results of the experiment are shown in the Figure 8

OXPHOS Hippocampus, membrane 1

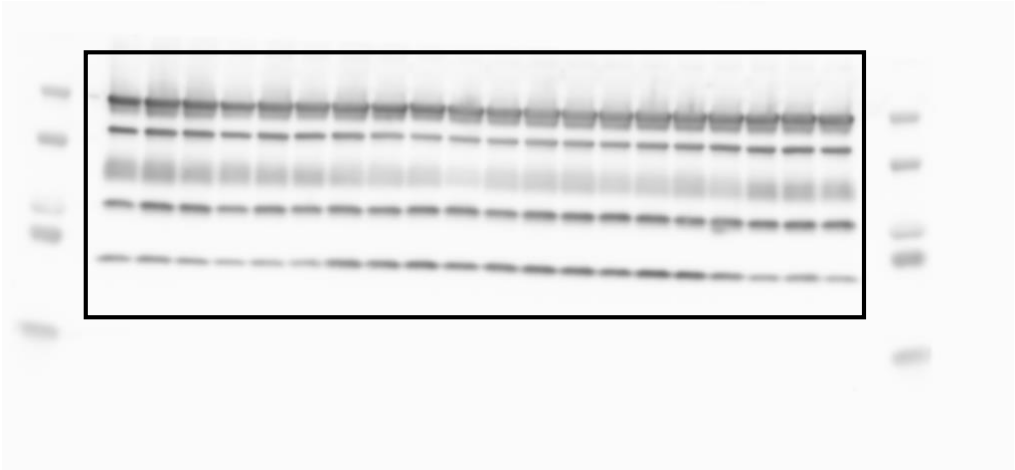

Vinculin as loading control to OXPHOS  
Hippocampus, membrane 1 and 2

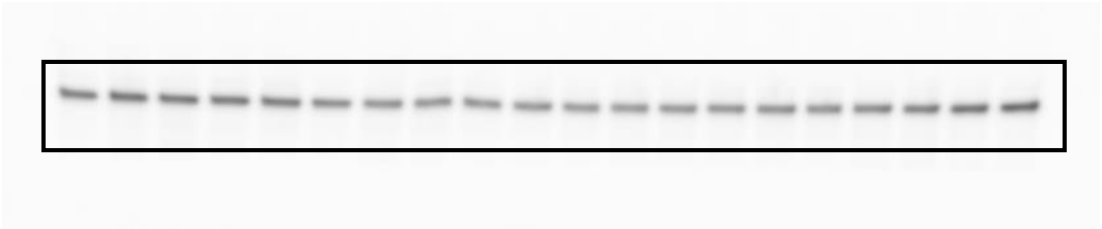

OXPHOS Hippocampus, membrane 2

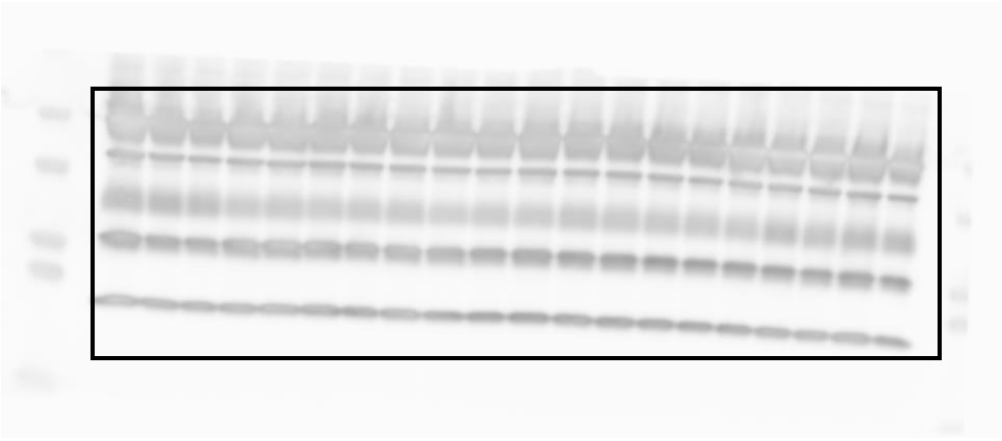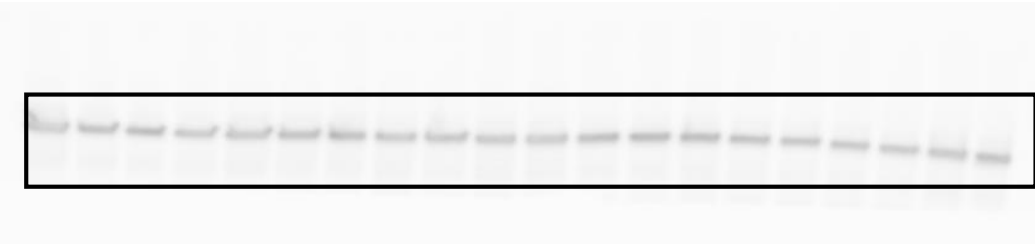

The bands from the left: WKY, WKY+PTU,WKY+PTU+VEN, WKY+PTU+T4, WKY+PTU+T4+VEN, WKY, WKY+PTU,WKY+PTU+VEN, WKY+PTU+T4, WKY+PTU+T4+VEN, WKY, WKY+PTU,WKY+PTU+VEN, WKY+PTU+T4, WKY+PTU+T4+VEN, WKY, WKY+PTU,WKY+PTU+VEN, WKY+PTU+T4, WKY+PTU+T4+VEN

The results of the experiment are shown in the Figure 8

GR Frontal cortex, membrane 1

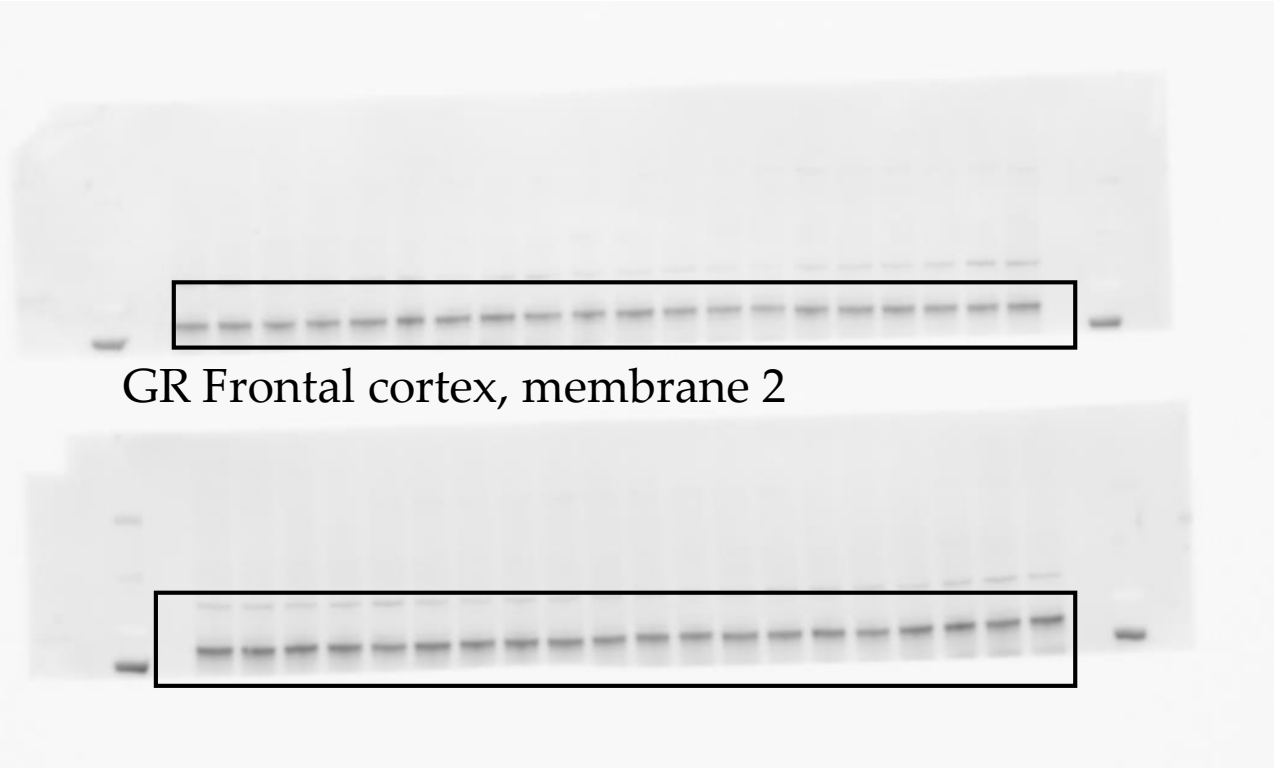

Vinculin as loading control to GR  
Frontal Cortex, membrane 1 and 2

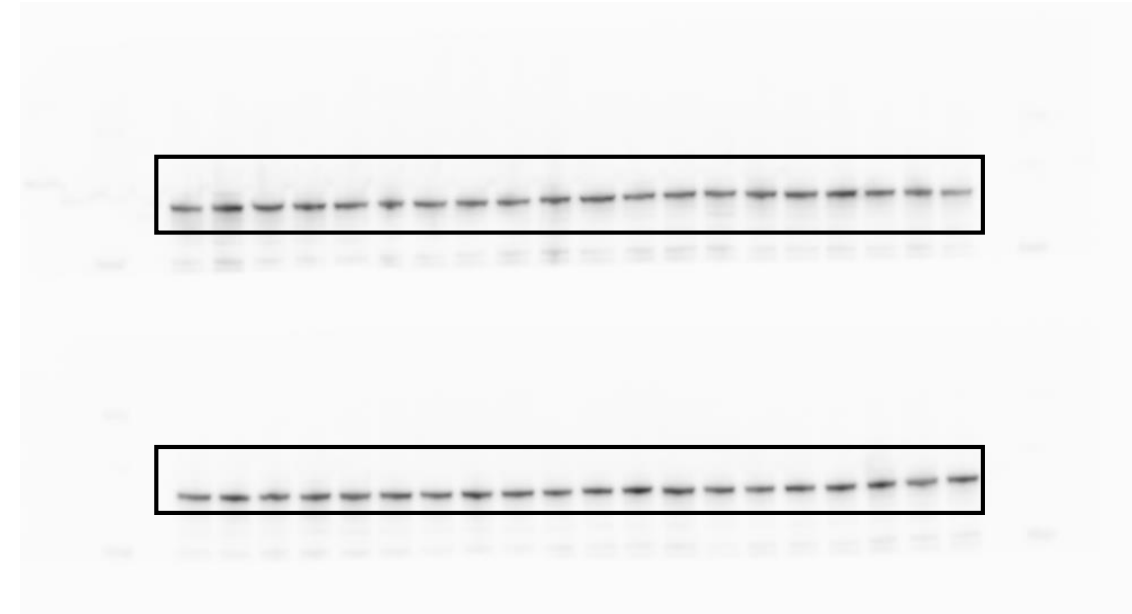

The bands from the left: WKY, WKY+PTU, WKY+PTU+VEN, WKY+PTU+T4, WKY+PTU+T4+VEN, WKY, WKY+PTU, WKY+PTU+VEN, WKY+PTU+T4, WKY+PTU+T4+VEN, WKY, WKY+PTU, WKY+PTU+VEN, WKY+PTU+T4, WKY+PTU+T4+VEN

The results of the experiment are shown in the Figure 10

Vinculin as loading control to GR  
Hippocampus, membrane 1 and 2

GR Hippocampus, membrane 1

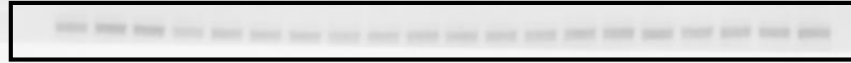

GR Hippocampus, membrane 2

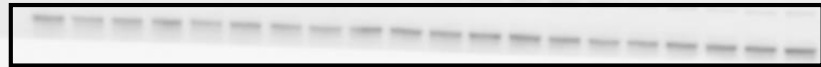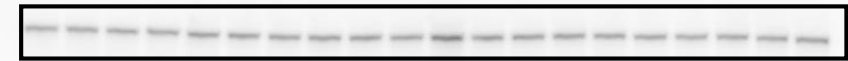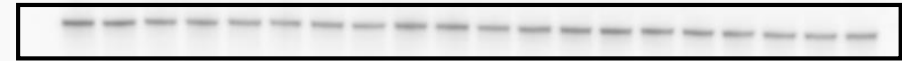

The bands from the left: WKY, WKY+PTU,WKY+PTU+VEN, WKY+PTU+T4, WKY+PTU+T4+VEN, WKY, WKY+PTU,WKY+PTU+VEN, WKY+PTU+T4, WKY+PTU+T4+VEN, WKY, WKY+PTU,WKY+PTU+VEN, WKY+PTU+T4, WKY+PTU+T4+VEN, WKY, WKY+PTU,WKY+PTU+VEN, WKY+PTU+T4, WKY+PTU+T4+VEN

The results of the experiment are shown in the Figure 10

FKBP51 Frontal Cortex, membrane 1

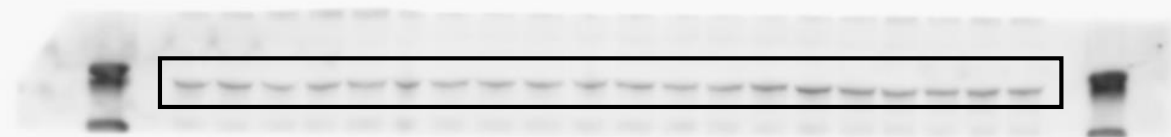

FKBP51 Frontal Cortex, membrane 2

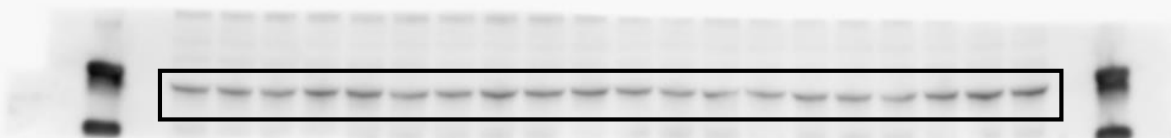

Vinculin as loading control to FKBP51  
Frontal Cortex, membrane 1 and 2

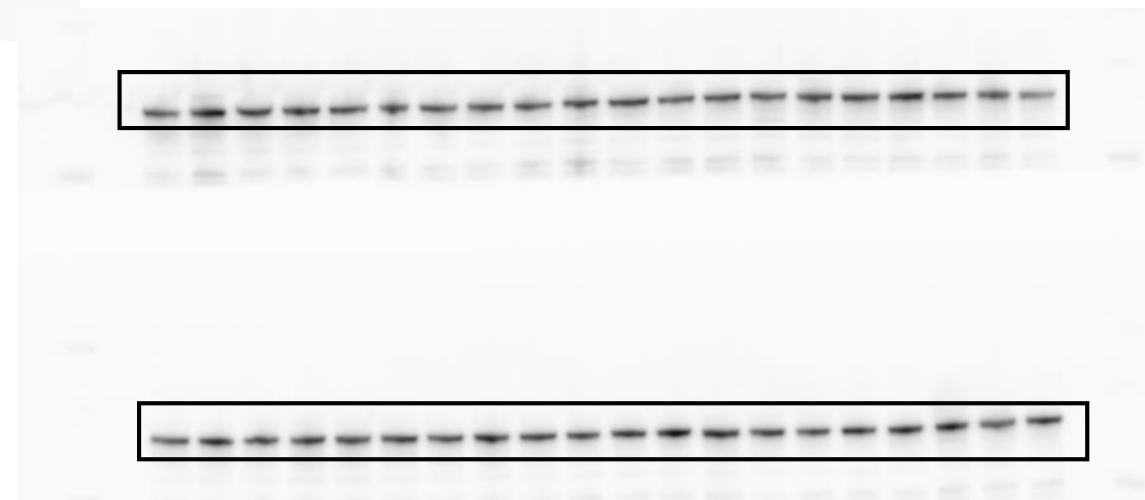

The bands from the left: WKY, WKY+PTU, WKY+PTU+VEN, WKY+PTU+T4, WKY+PTU+T4+VEN, WKY, WKY+PTU, WKY+PTU+VEN, WKY+PTU+T4, WKY+PTU+T4+VEN, WKY, WKY+PTU, WKY+PTU+VEN, WKY+PTU+T4, WKY+PTU+T4+VEN

The results of the experiment are shown in the Figure 10

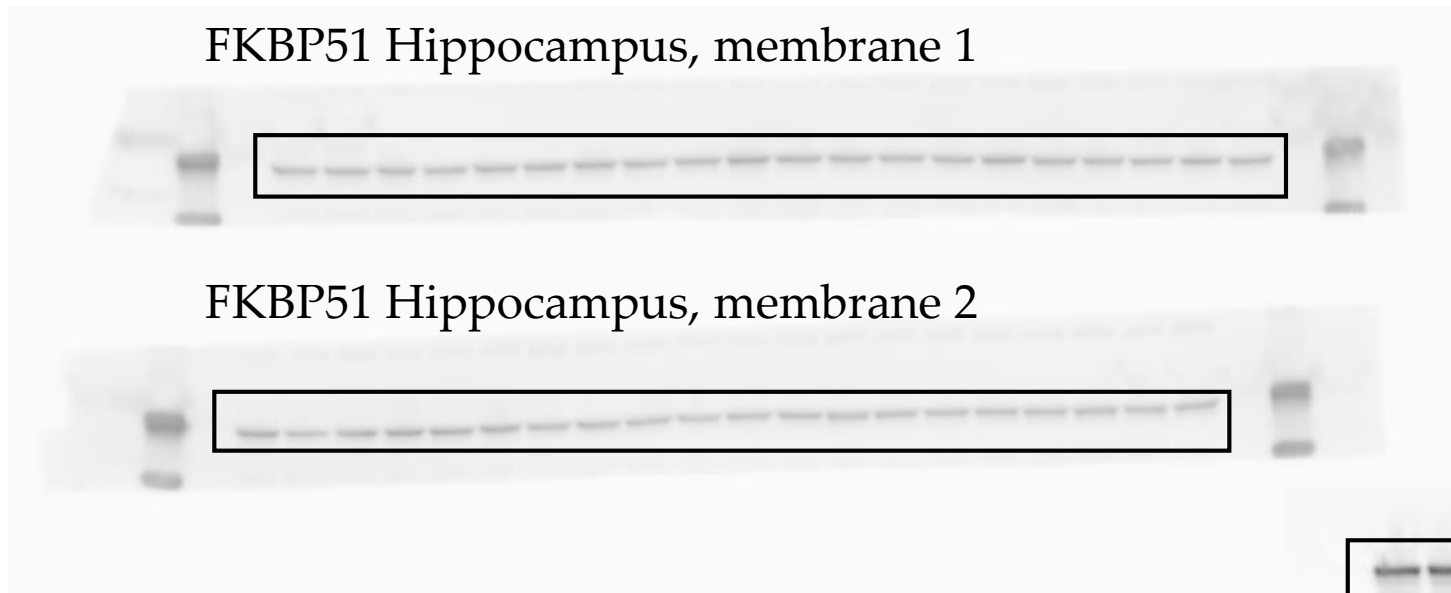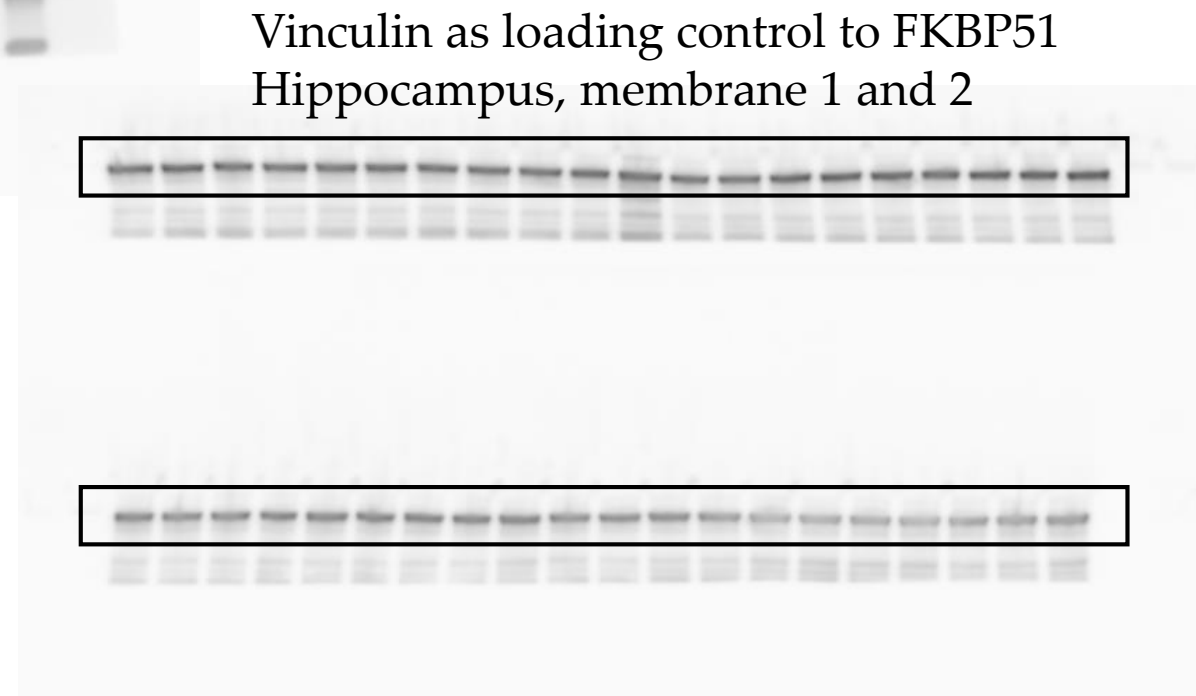

The bands from the left: WKY, WKY+PTU,WKY+PTU+VEN, WKY+PTU+T4, WKY+PTU+T4+VEN, WKY, WKY+PTU,WKY+PTU+VEN, WKY+PTU+T4, WKY+PTU+T4+VEN, WKY, WKY+PTU,WKY+PTU+VEN, WKY+PTU+T4, WKY+PTU+T4+VEN, WKY, WKY+PTU,WKY+PTU+VEN, WKY+PTU+T4, WKY+PTU+T4+VEN

The results of the experiment are shown in the Figure 10

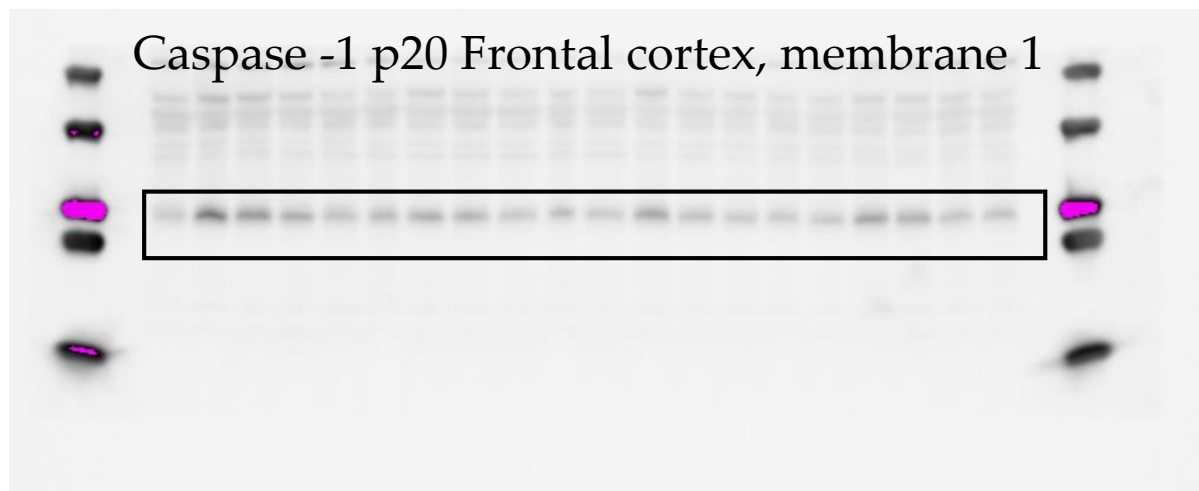

Vinculin as loading control to Caspase-1 p20  
Frontal cortex, membrane 1 and 2

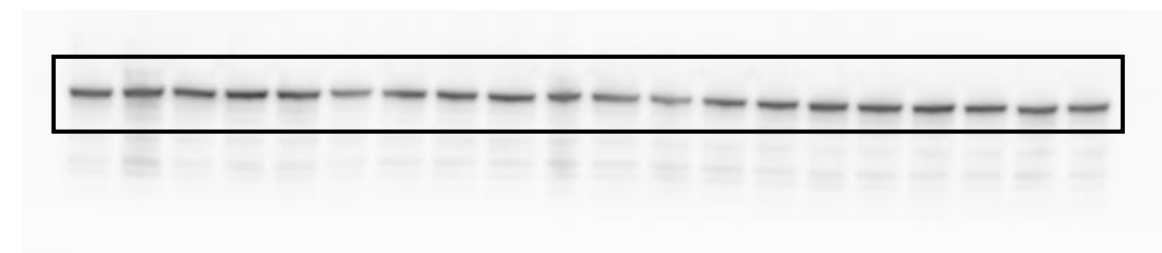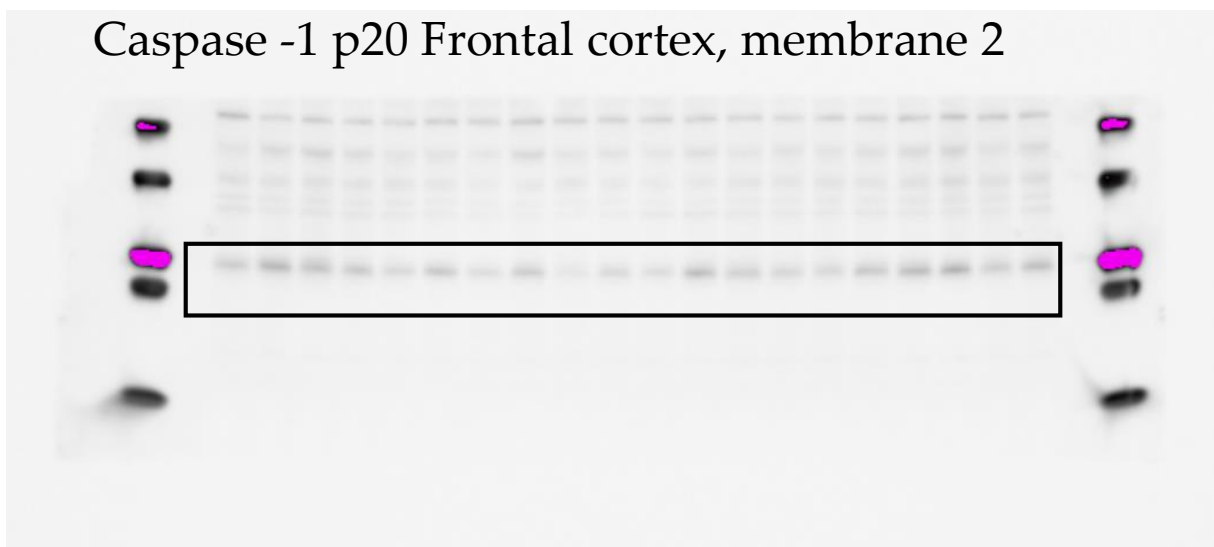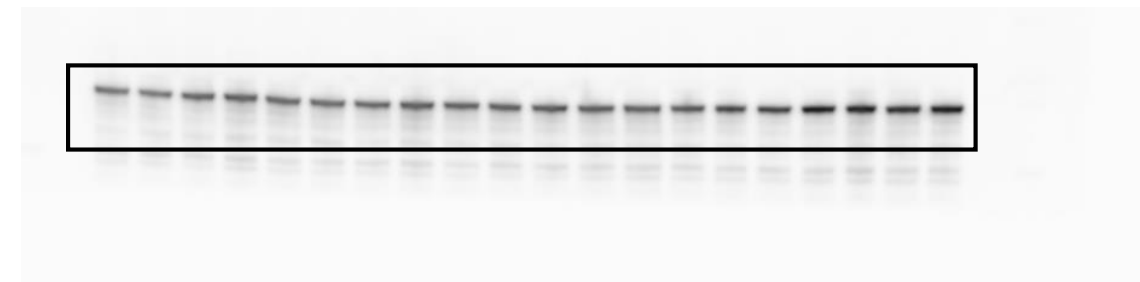

The bands from the left: WKY, WKY+PTU,WKY+PTU+VEN, WKY+PTU+T4, WKY+PTU+T4+VEN, WKY, WKY+PTU,WKY+PTU+VEN, WKY+PTU+T4, WKY+PTU+T4+VEN, WKY, WKY+PTU,WKY+PTU+VEN, WKY+PTU+T4, WKY+PTU+T4+VEN, WKY, WKY+PTU,WKY+PTU+VEN, WKY+PTU+T4, WKY+PTU+T4+VEN

The results of the experiment are shown in the Figure 11

Caspase -1 p20 Hippocampus, membrane 1

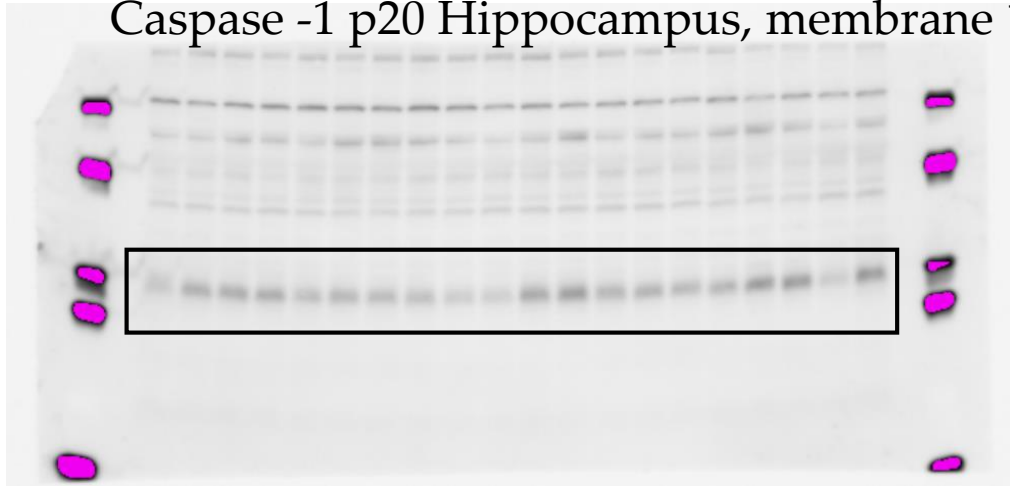

Vinculin as loading control to Caspase-1 p20  
Hippocampus, membrane 1 and 2

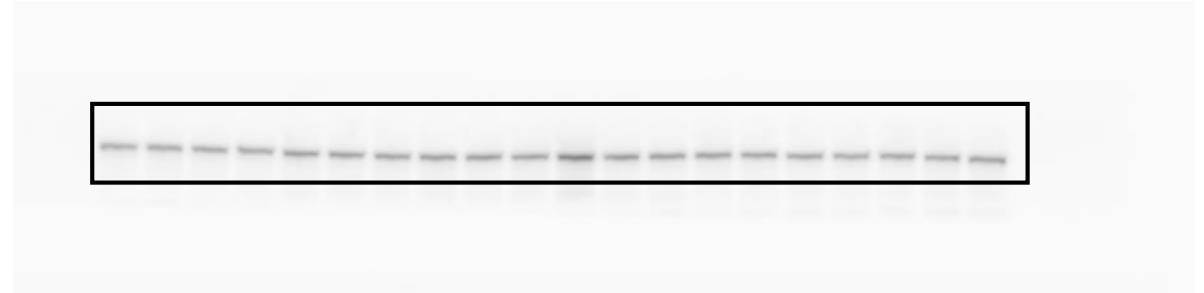

Caspase -1 p20 Hippocampus, membrane 2

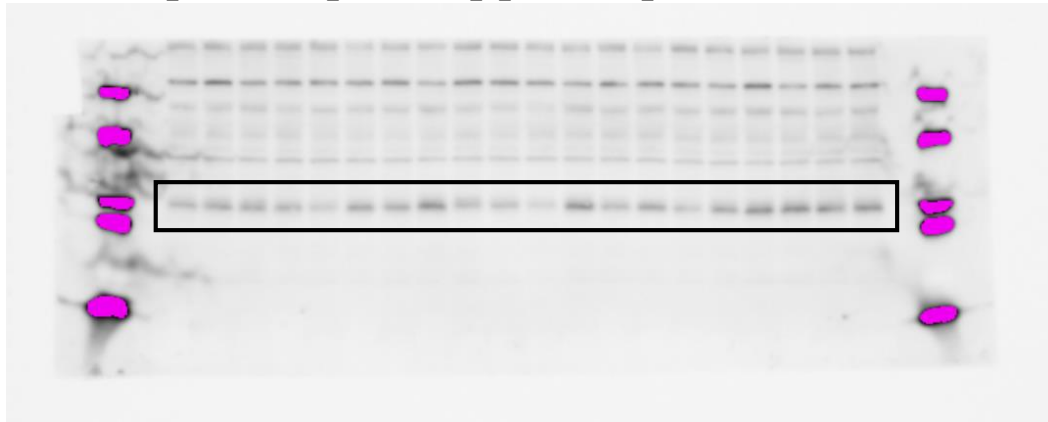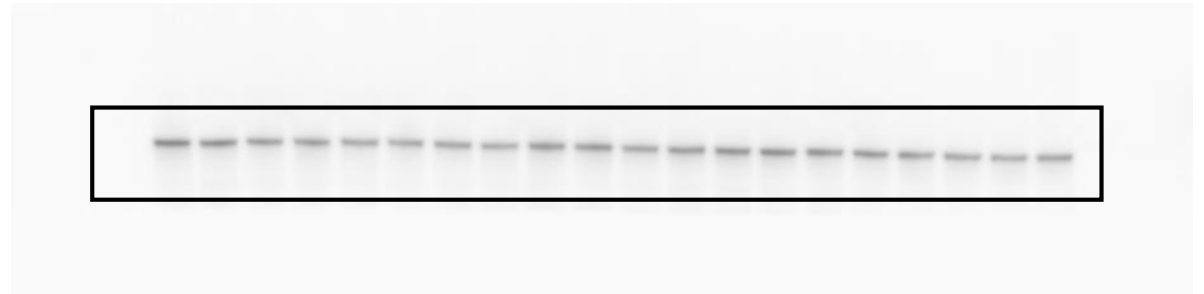

The bands from the left: WKY, WKY+PTU,WKY+PTU+VEN, WKY+PTU+T4, WKY+PTU+T4+VEN, WKY, WKY+PTU,WKY+PTU+VEN, WKY+PTU+T4, WKY+PTU+T4+VEN, WKY, WKY+PTU,WKY+PTU+VEN, WKY+PTU+T4, WKY+PTU+T4+VEN, WKY, WKY+PTU,WKY+PTU+VEN, WKY+PTU+T4, WKY+PTU+T4+VEN

The results of the experiment are shown in the Figure 11



MCT2 Frontal Cortex, membrane 1

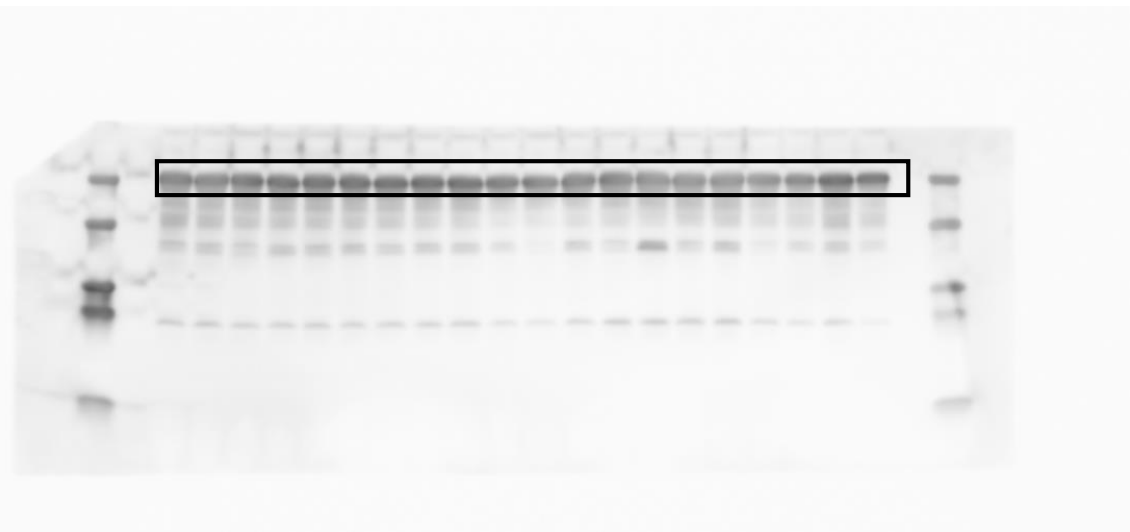

MCT2 Frontal Cortex, membrane 2

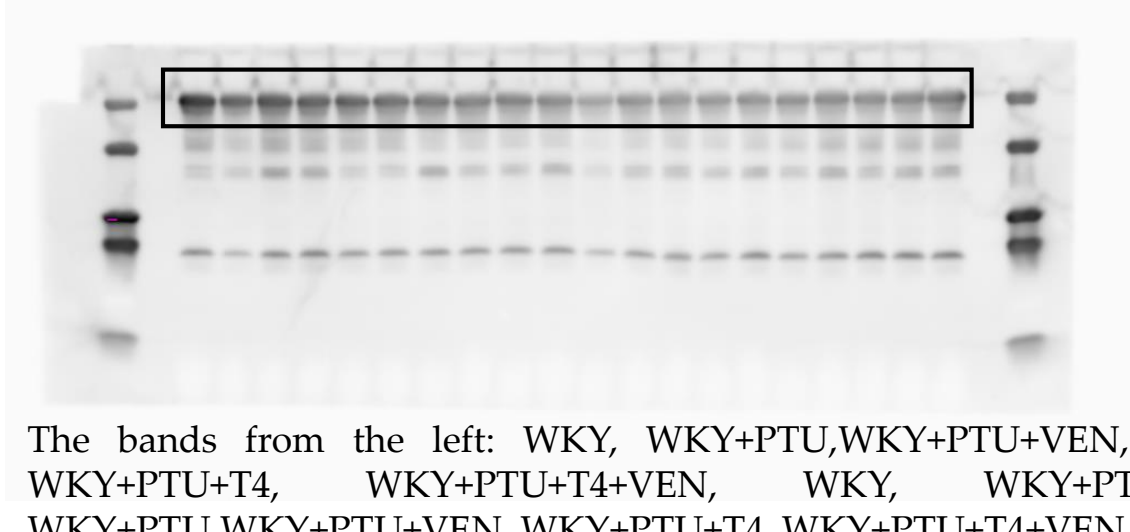

Vinculin as loading control to MCT2  
Frontal Cortex, membrane 1 and 2

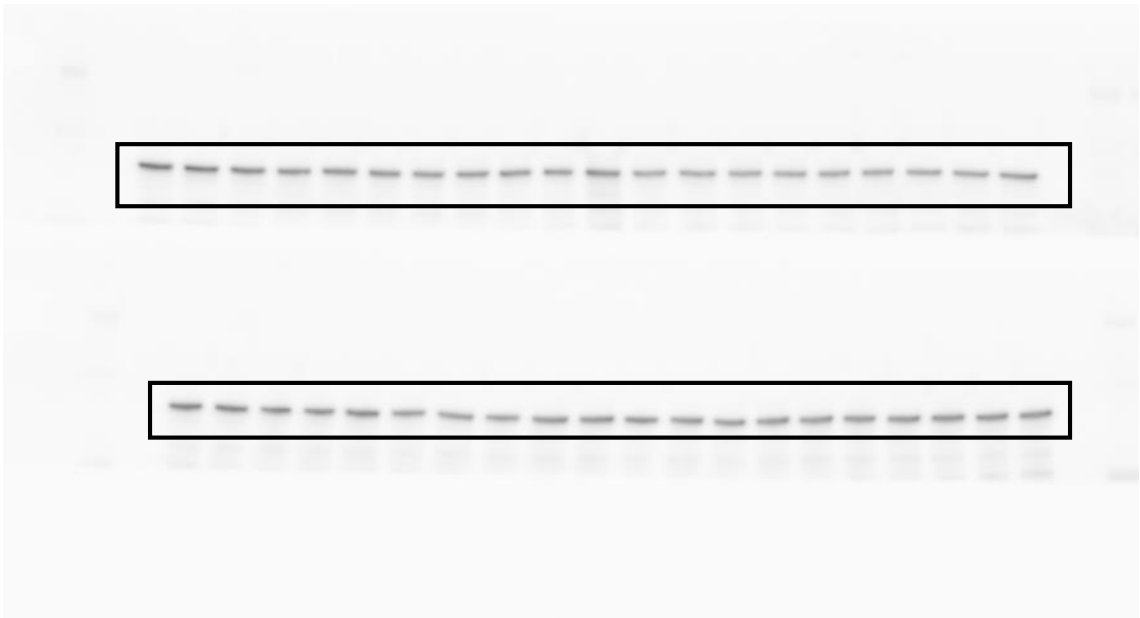

The bands from the left: WKY, WKY+PTU,WKY+PTU+VEN, WKY+PTU+T4, WKY+PTU+T4+VEN, WKY, WKY+PTU,WKY+PTU+VEN, WKY+PTU+T4, WKY+PTU+T4+VEN, WKY, WKY+PTU,WKY+PTU+VEN, WKY+PTU+T4, WKY+PTU+T4+VEN, WKY, WKY+PTU,WKY+PTU+VEN, WKY+PTU+T4, WKY+PTU+T4+VEN

The results of the experiment are shown in the Table 1

MCT2 Hippocampus, membrane 1

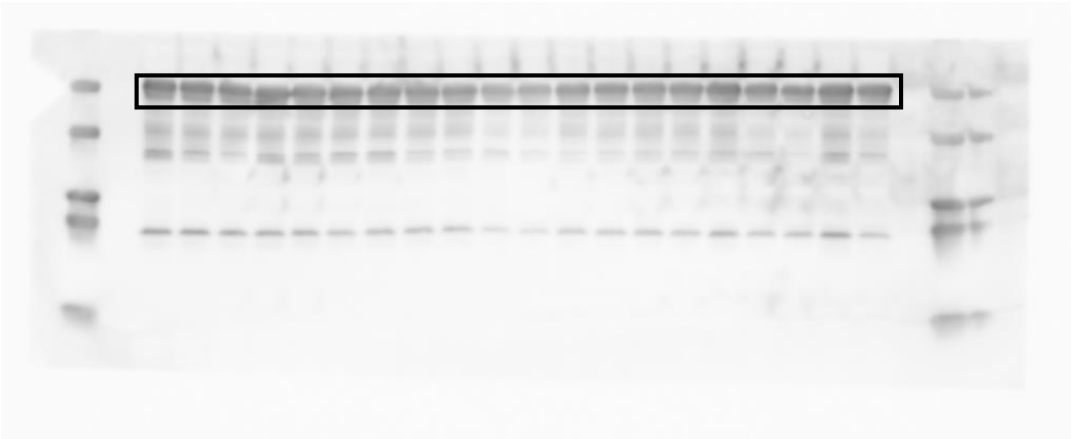

Vinculin as loading control to MCT2  
Hippocampus, membrane 1 and 2

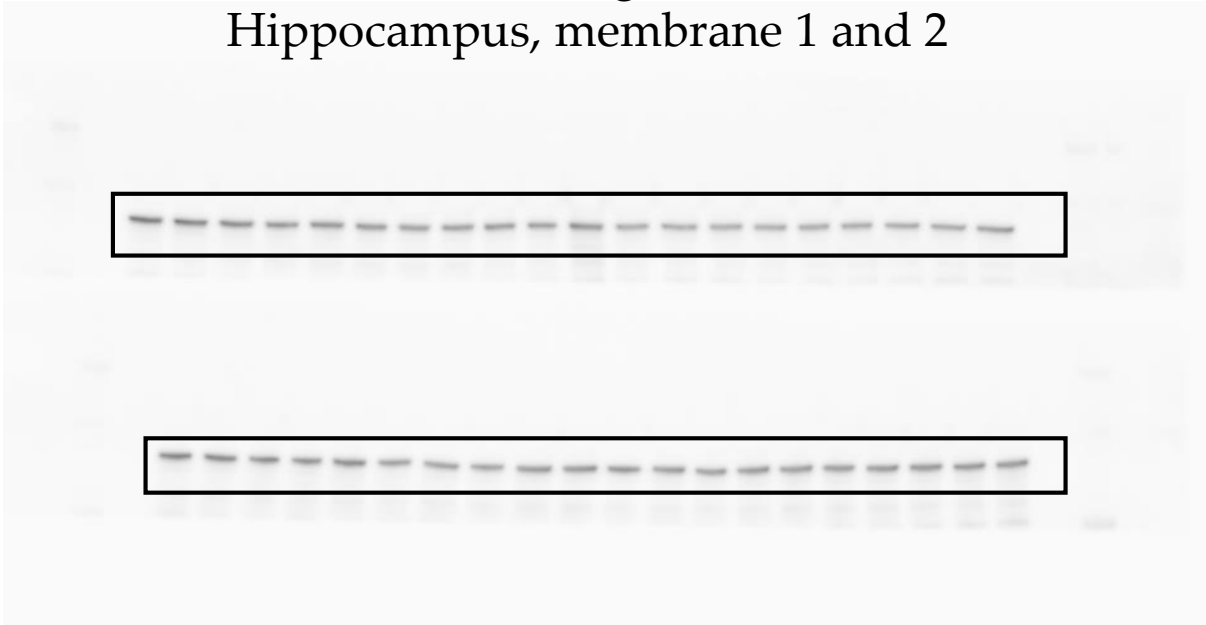

MCT2 Hippocampus, membrane 2

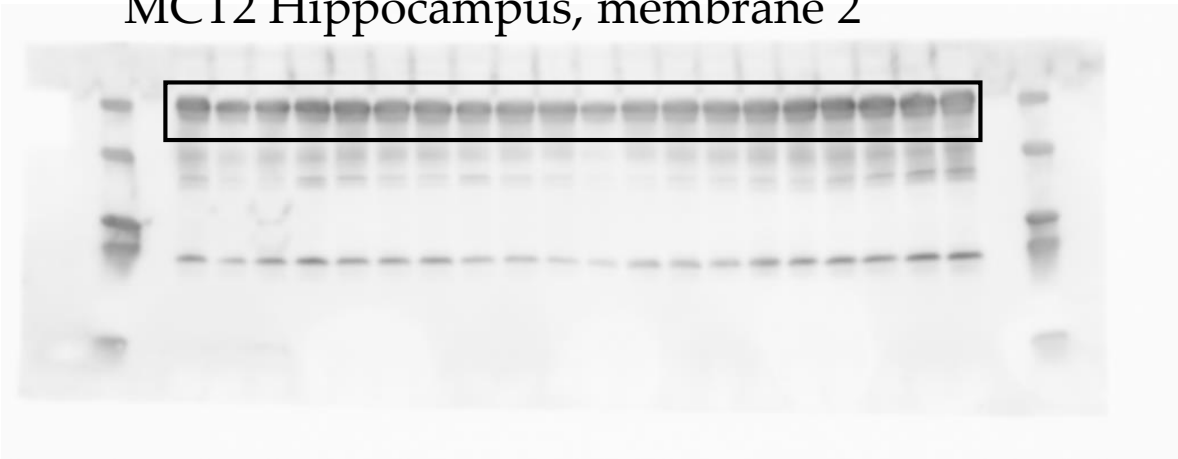

The bands from the left: WKY, WKY+PTU,WKY+PTU+VEN, WKY+PTU+T4, WKY+PTU+T4+VEN, WKY, WKY+PTU,WKY+PTU+VEN, WKY+PTU+T4, WKY+PTU+T4+VEN, WKY, WKY+PTU,WKY+PTU+VEN, WKY+PTU+T4, WKY+PTU+T4+VEN, WKY, WKY+PTU,WKY+PTU+VEN, WKY+PTU+T4, WKY+PTU+T4+VEN

The results of the experiment are shown in the Table 1

MCT4 Frontal Cortex, membrane 1

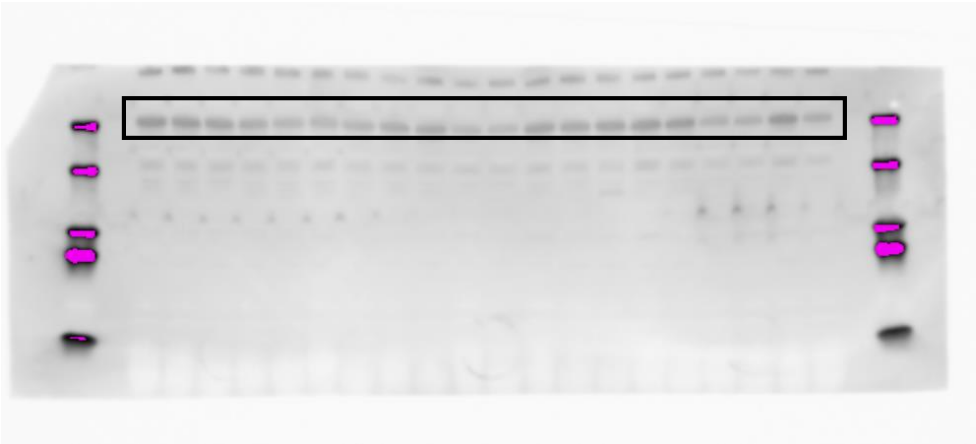

Vinculin as loading control to MCT4  
Frontal Cortex, membrane 1 and 2

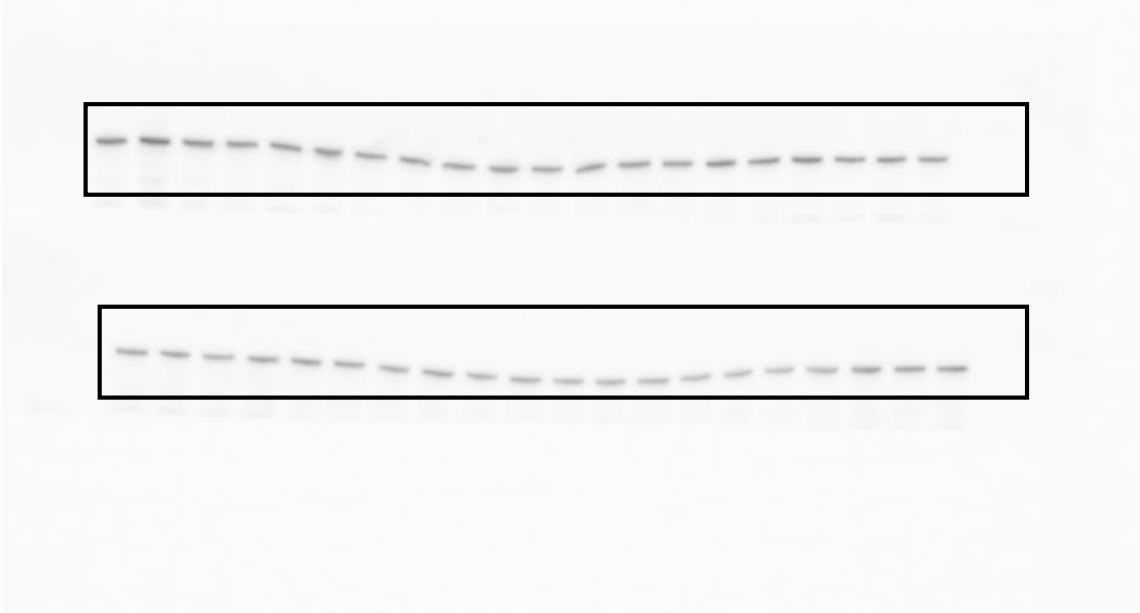

MCT4 Frontal Cortex, membrane 2

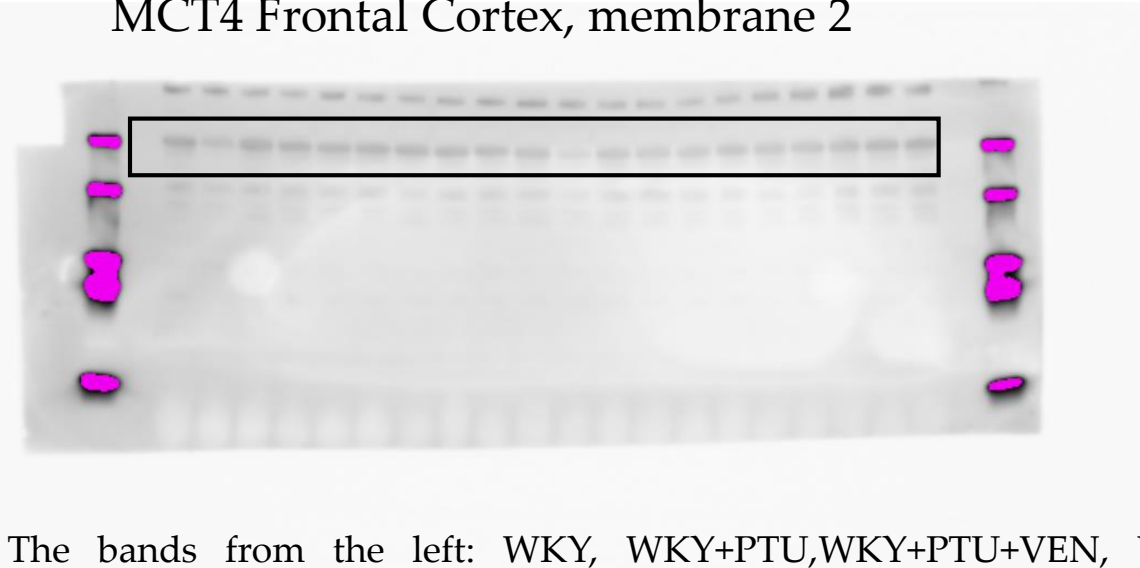

The bands from the left: WKY, WKY+PTU,WKY+PTU+VEN, WKY+PTU+T4, WKY+PTU+T4+VEN, WKY, WKY+PTU,WKY+PTU+VEN, WKY+PTU+T4, WKY+PTU+T4+VEN, WKY, WKY+PTU,WKY+PTU+VEN, WKY+PTU+T4, WKY+PTU+T4+VEN, WKY, WKY+PTU,WKY+PTU+VEN, WKY+PTU+T4, WKY+PTU+T4+VEN

The results of the experiment are shown in the Table 1

MCT4 Hippocampus, membrane 1

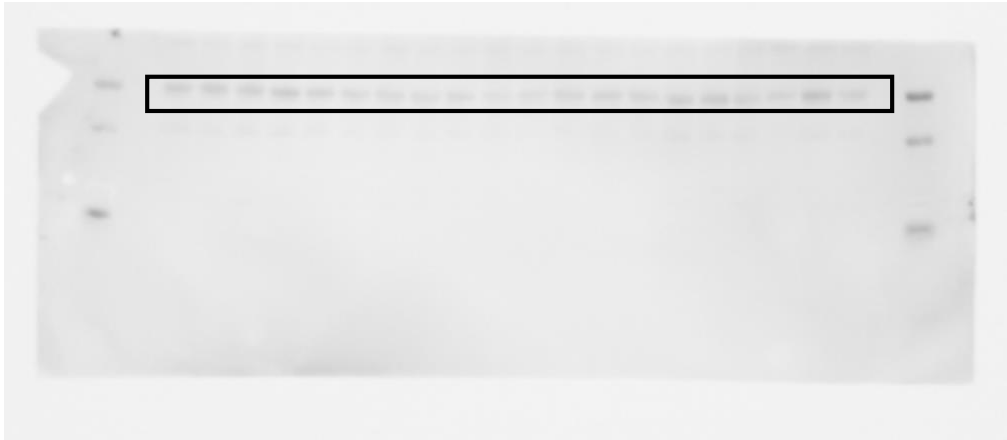

Vinculin as loading control to MCT4  
Hippocampus, membrane 1 and 2

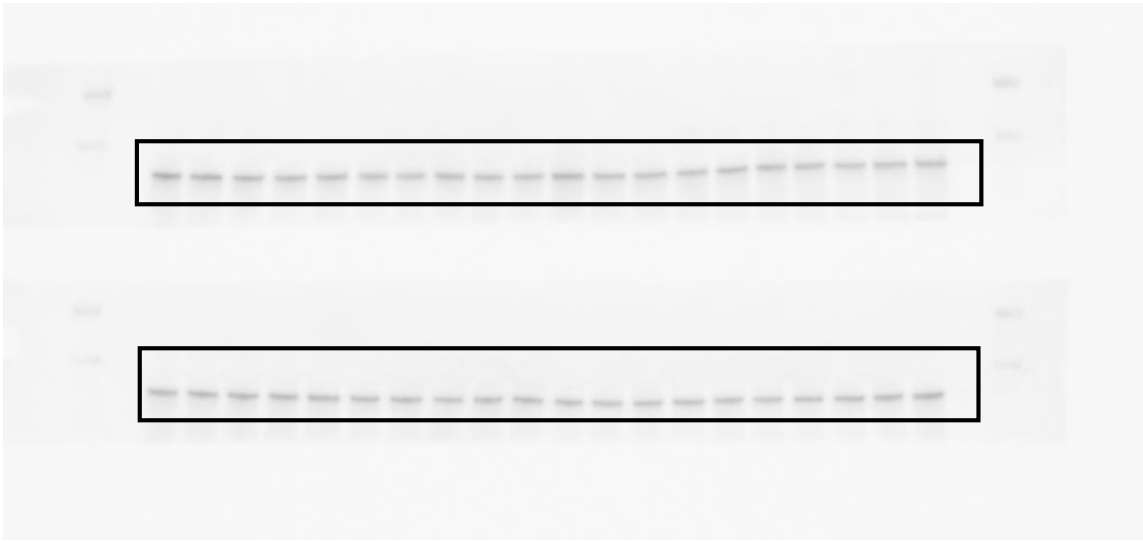

MCT4 Hippocampus, membrane 2

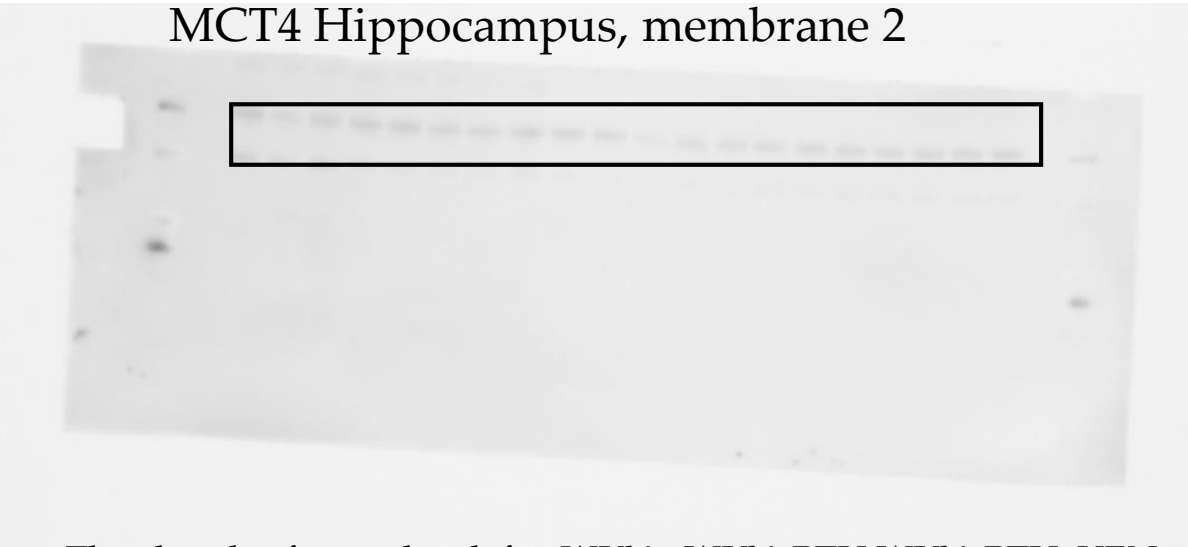

The bands from the left: WKY, WKY+PTU,WKY+PTU+VEN, WKY+PTU+T4, WKY+PTU+T4+VEN, WKY, WKY+PTU,WKY+PTU+VEN, WKY+PTU+T4, WKY+PTU+T4+VEN, WKY, WKY+PTU,WKY+PTU+VEN, WKY+PTU+T4, WKY+PTU+T4+VEN, WKY, WKY+PTU,WKY+PTU+VEN, WKY+PTU+T4, WKY+PTU+T4+VEN

The results of the experiment are shown in the Table 1

HCAR1 Frontal cortex, membrane 1

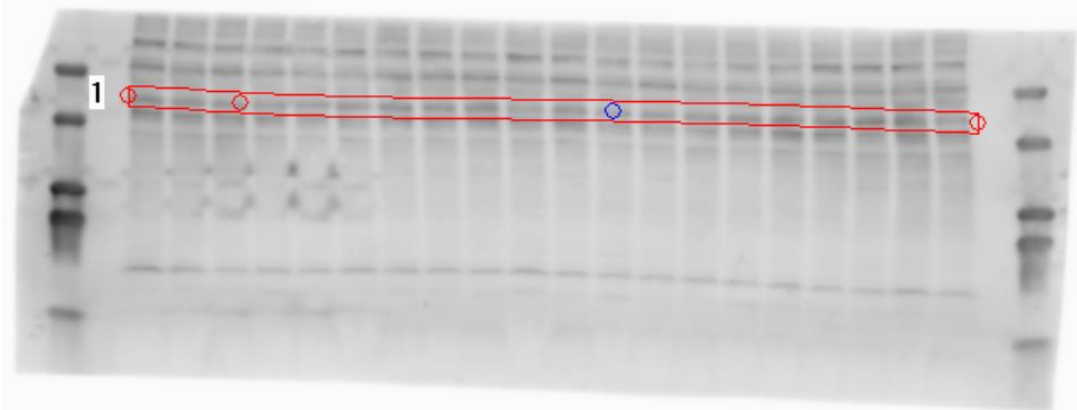

Vinculin as loading control to HCAR1  
Frontal Cortex, membrane 1 and 2

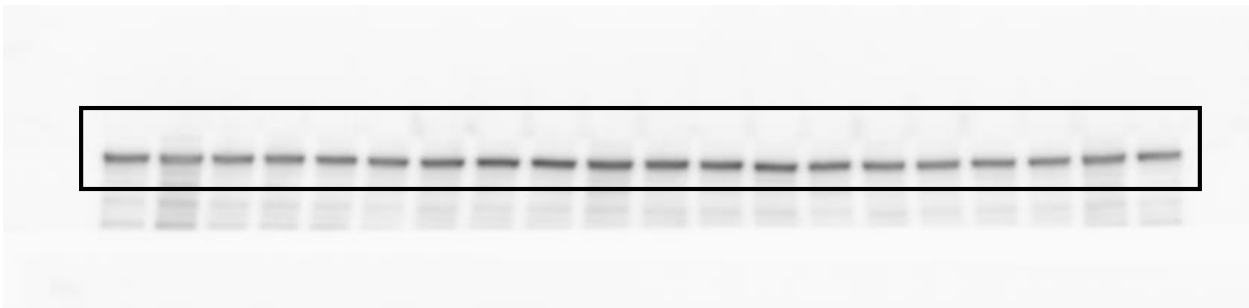

HCAR1 Frontal cortex, membrane 2

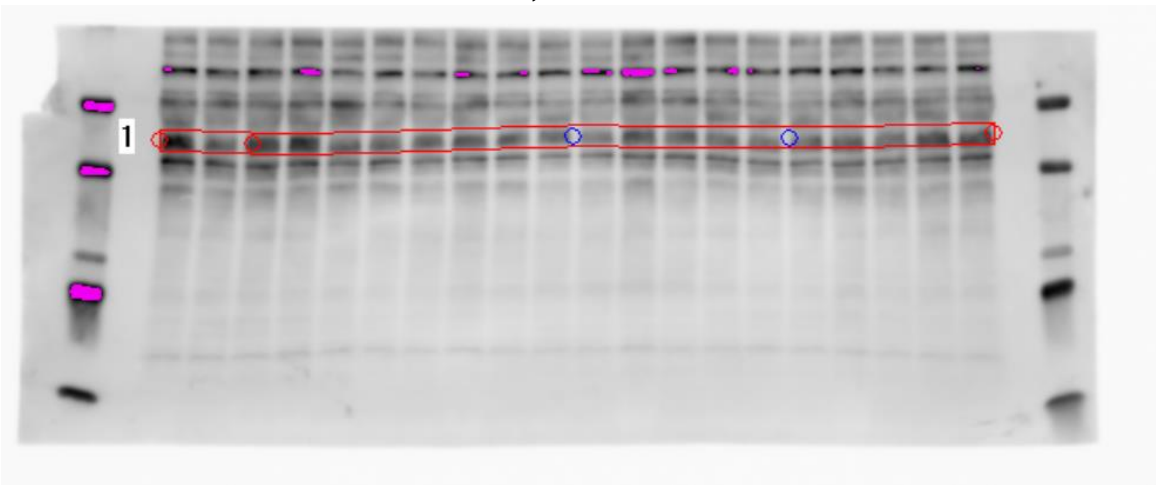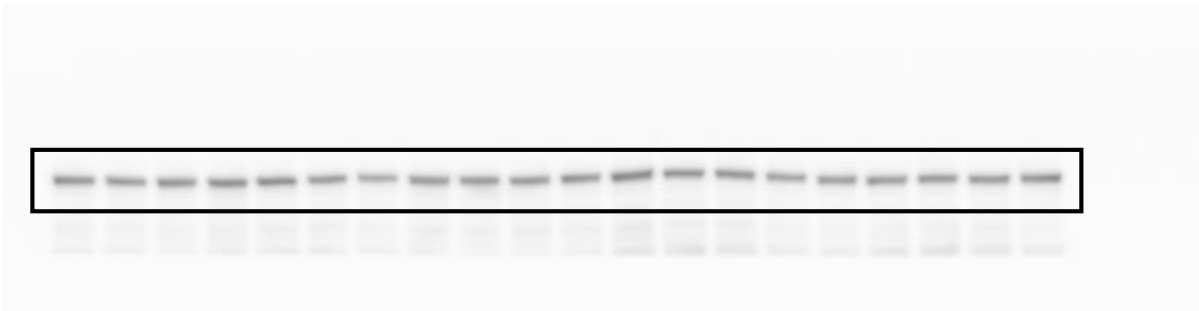

The bands from the left: WKY, WKY+PTU,WKY+PTU+VEN, WKY+PTU+T4, WKY+PTU+T4+VEN, WKY, WKY+PTU,WKY+PTU+VEN, WKY+PTU+T4, WKY+PTU+T4+VEN, WKY, WKY+PTU,WKY+PTU+VEN, WKY+PTU+T4, WKY+PTU+T4+VEN, WKY, WKY+PTU,WKY+PTU+VEN, WKY+PTU+T4, WKY+PTU+T4+VEN

The results of the experiment are shown in the Table 1

HCAR1 Hippocampus, membrane 1

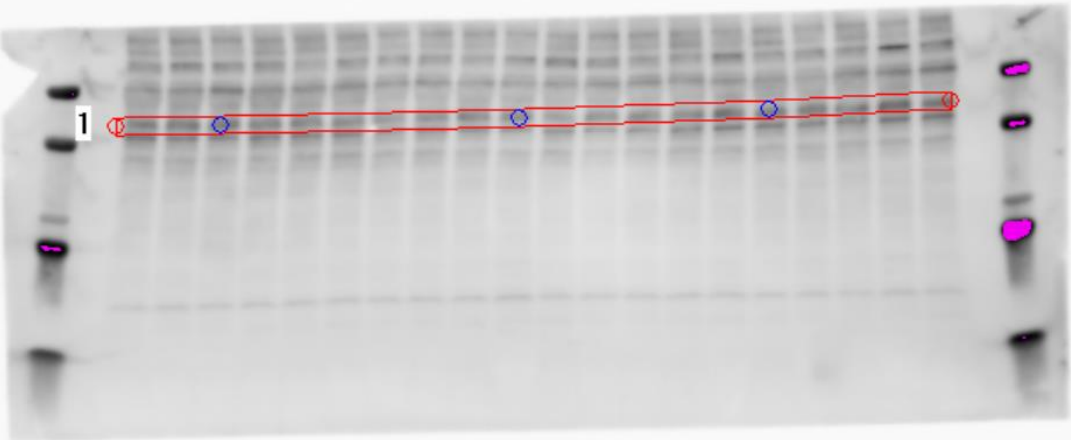

Vinculin as loading control to HCAR1  
Hippocampus, membrane 1 and 2

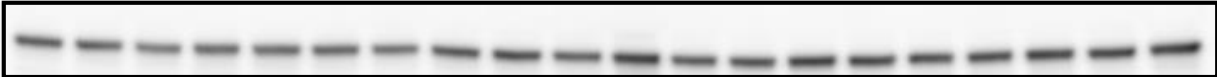

HCAR1 Hippocampus, membrane 2

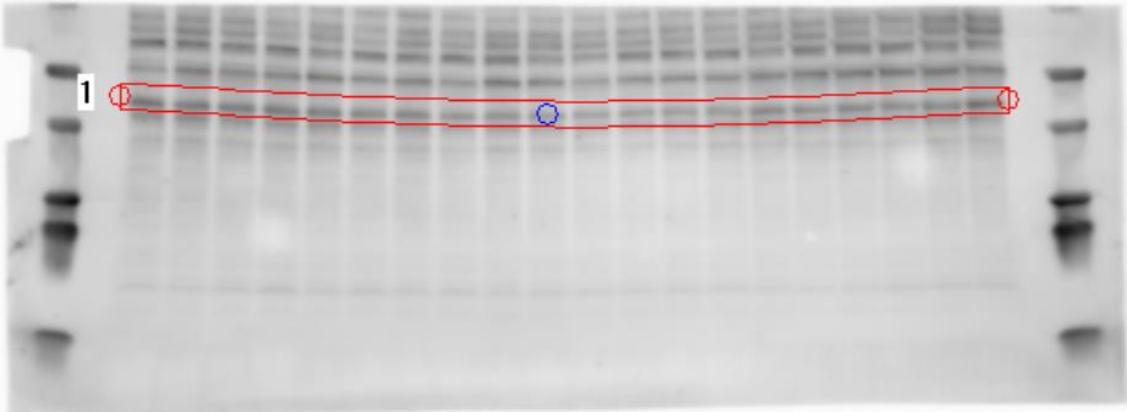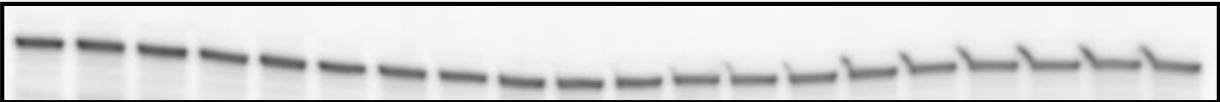

The bands from the left: WKY, WKY+PTU,WKY+PTU+VEN, WKY+PTU+T4, WKY+PTU+T4+VEN, WKY, WKY+PTU,WKY+PTU+VEN, WKY+PTU+T4, WKY+PTU+T4+VEN, WKY, WKY+PTU,WKY+PTU+VEN, WKY+PTU+T4, WKY+PTU+T4+VEN, WKY, WKY+PTU,WKY+PTU+VEN, WKY+PTU+T4, WKY+PTU+T4+VEN

The results of the experiment are shown in the Table 1

Bax Frontal Cortex, membrane 1

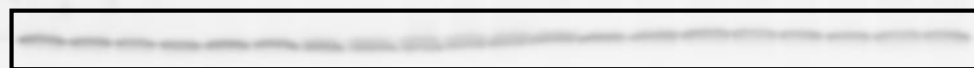

Bax Frontal Cortex, membrane 2

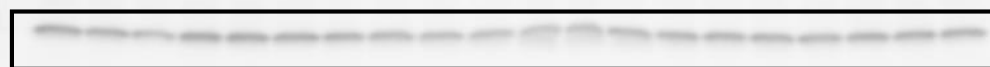

Vinculin as loading control to Bax  
Frontal Cortex, membrane 1 and 2

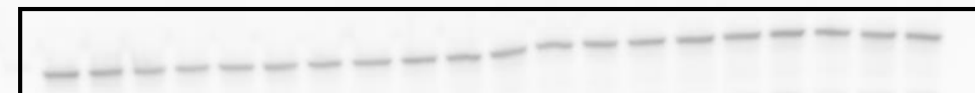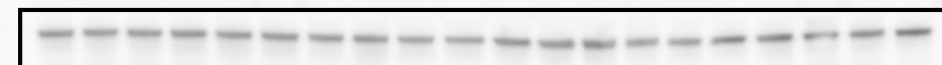

The bands from the left: WKY, WKY+PTU,WKY+PTU+VEN, WKY+PTU+T4, WKY+PTU+T4+VEN, WKY, WKY+PTU,WKY+PTU+VEN, WKY+PTU+T4, WKY+PTU+T4+VEN, WKY, WKY+PTU,WKY+PTU+VEN, WKY+PTU+T4, WKY+PTU+T4+VEN, WKY, WKY+PTU,WKY+PTU+VEN, WKY+PTU+T4, WKY+PTU+T4+VEN

The results of the experiment are shown in the Table 2

Bax Hippocampus, membrane 1

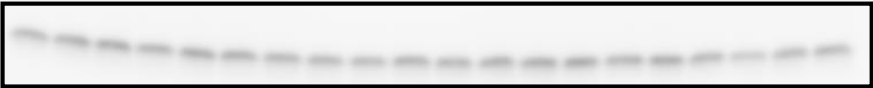

Bax Hippocampus, membrane 2

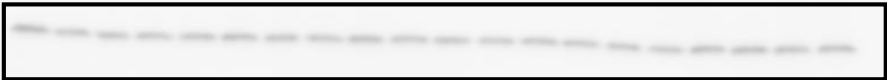

Vinculin as loading control to Bax  
Hippocampus, membrane 1 and 2

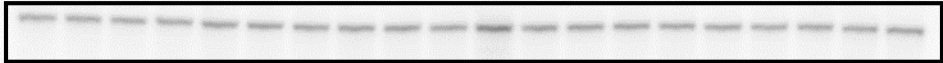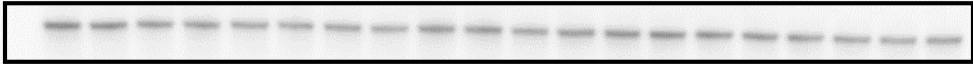

The bands from the left: WKY, WKY+PTU,WKY+PTU+VEN, WKY+PTU+T4, WKY+PTU+T4+VEN, WKY, WKY+PTU,WKY+PTU+VEN, WKY+PTU+T4, WKY+PTU+T4+VEN, WKY, WKY+PTU,WKY+PTU+VEN, WKY+PTU+T4, WKY+PTU+T4+VEN, WKY, WKY+PTU,WKY+PTU+VEN, WKY+PTU+T4, WKY+PTU+T4+VEN

The results of the experiment are shown in the Table 2



beclin 1 Frontal Cortex, membrane 1

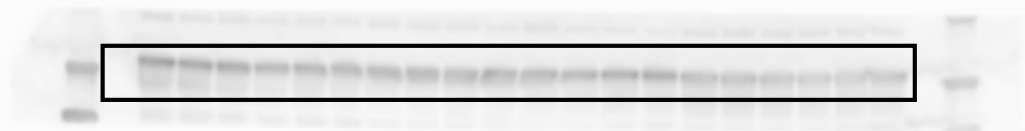

beclin 1 Frontal Cortex, membrane 2

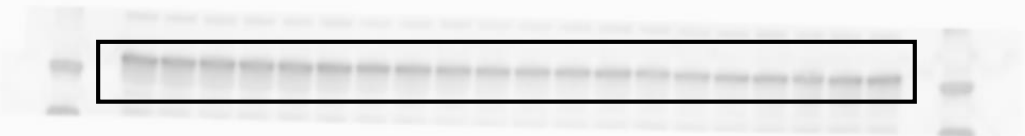

Vinculin as loading control to beclin 1  
Frontal cortex, membrane 1 and 2

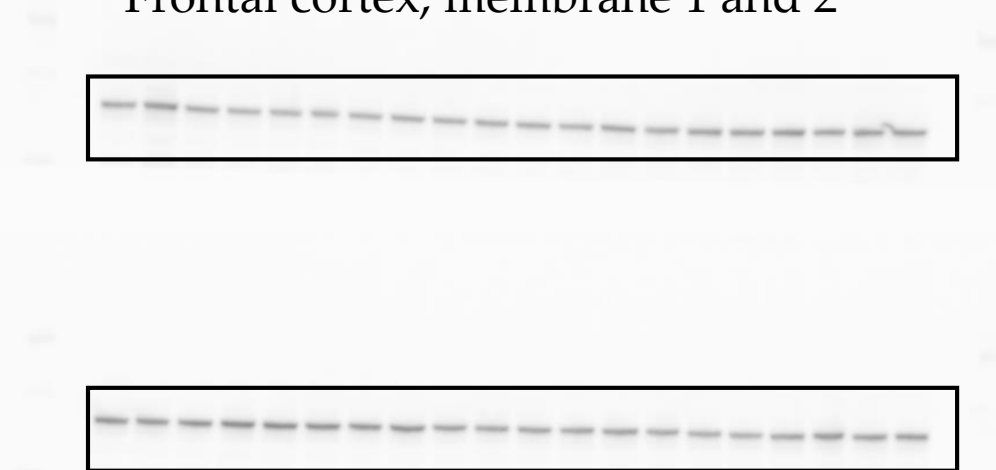

The bands from the left: WKY, WKY+PTU,WKY+PTU+VEN, WKY+PTU+T4, WKY+PTU+T4+VEN, WKY, WKY+PTU,WKY+PTU+VEN, WKY+PTU+T4, WKY+PTU+T4+VEN, WKY, WKY+PTU,WKY+PTU+VEN, WKY+PTU+T4, WKY+PTU+T4+VEN, WKY, WKY+PTU,WKY+PTU+VEN, WKY+PTU+T4, WKY+PTU+T4+VEN

The results of the experiment are shown in the Table 2

beclin 1 Hippocampus, membrane 1

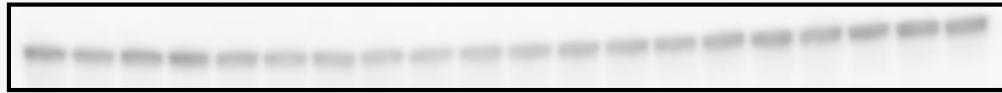

beclin 1 Hippocampus, membrane 2

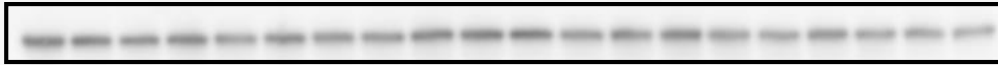

Vinculin as loading control to beclin 1  
Hippocampus, membrane 1 and 2

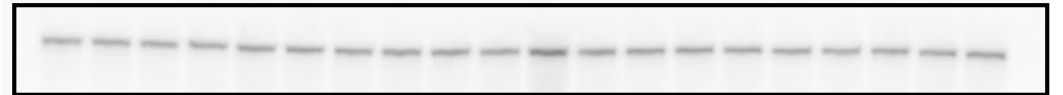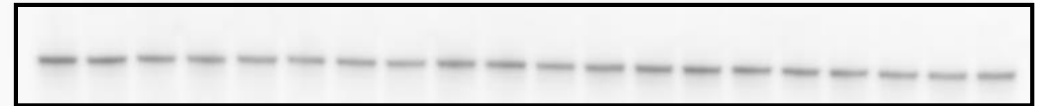

The bands from the left: WKY, WKY+PTU,WKY+PTU+VEN, WKY+PTU+T4, WKY+PTU+T4+VEN, WKY, WKY+PTU,WKY+PTU+VEN, WKY+PTU+T4, WKY+PTU+T4+VEN, WKY, WKY+PTU,WKY+PTU+VEN, WKY+PTU+T4, WKY+PTU+T4+VEN, WKY, WKY+PTU,WKY+PTU+VEN, WKY+PTU+T4, WKY+PTU+T4+VEN

The results of the experiment are shown in the Table 2

not all WB samples (presented on pages 1-18) were analyzed (poor quality or outliers were not analyzed)
